# Supplementary material
Source: PubMed Central journal article supplement (PMC6178100)
Supplement: 12250_2018_48_MOESM1_ESM.pdf [file 12250_2018_48_MOESM1_ESM.pdf]

## Electronic Supplementary Material

## Serological Cross Reactivity between Zika and Dengue Viruses in Experimentally Infected Monkeys

Shailendra Mani<sup>1#</sup>, Chee Wah Tan<sup>1#</sup>, Lin-Fa Wang<sup>1✉</sup>, Danielle E. Anderson<sup>1✉</sup>

1. Programme in Emerging Infectious Diseases, Duke-NUS Medical School, 169857 Singapore, Singapore.

Supporting information to DOI: 10.1007/s12250-018- 0048-8

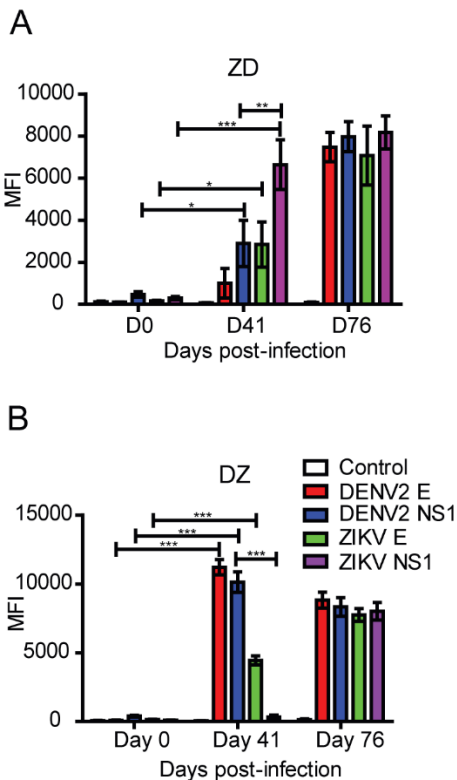

**Supplementary Figure S1** Multiplex immunoassay of monkeys sera ( $n = 3$ ) infected with (A) ZIKV followed by DENV at Day 41, and (B) DENV followed by ZIKV at Day 40. Sera sample were tested for seropositive for DENV2 E, DENV2 NS1, ZIKV E and ZIKV NS1. Asterisks indicate statistically significant differences (\*,  $P < 0.05$ ; \*\*,  $P < 0.01$ ; \*\*\*,  $P < 0.001$ ). Error bars represent means  $\pm$  standard error.

Table S1

|        |     | Net MFI value of each antigen |          |           |         |          | Ratio of D/Z or Z/D |         |           |         |
|--------|-----|-------------------------------|----------|-----------|---------|----------|---------------------|---------|-----------|---------|
|        |     | Control                       | DENV2 E  | DENV2 NS1 | ZIKV E  | ZIKV NS1 | DENV/ZIKV           |         | ZIKV/DENV |         |
|        |     |                               |          |           |         |          | E/E                 | NS1/NS1 | E/E       | NS1/NS1 |
| 0 dpi  | N1  | 189.63                        | 118.90   | 405.59    | 162.58  | 409.50   | 0.73                | 0.99    | 1.37      | 1.01    |
| 0 dpi  | N2  | 89.53                         | 104.39   | 716.27    | 205.40  | 350.50   | 0.51                | 2.04    | 1.97      | 0.49    |
| 0 dpi  | N3  | 88.83                         | 98.73    | 287.04    | 108.25  | 140.50   | 0.91                | 2.04    | 1.10      | 0.49    |
| 41 dpi | Z1  | 86.98                         | 2388.22  | 3489.87   | 3349.75 | 4516.75  | 0.71                | 0.77    | 1.40      | 1.29    |
| 41 dpi | Z2  | 74.09                         | 122.79   | 758.77    | 770.28  | 6805.50  | 0.16                | 0.11    | 6.27      | 8.97    |
| 41 dpi | Z3  | 57.42                         | 495.94   | 4431.24   | 4405.81 | 8597.75  | 0.11                | 0.52    | 8.88      | 1.94    |
| 76 dpi | ZD1 | 113.99                        | 6774.00  | 6629.99   | 6982.65 | 6925.25  | 0.97                | 0.96    | 1.03      | 1.04    |
| 76 dpi | ZD2 | 103.57                        | 6784.97  | 8188.51   | 4685.93 | 7986.75  | 1.45                | 1.03    | 0.69      | 0.98    |
| 76 dpi | ZD3 | 53.79                         | 8871.87  | 9093.29   | 9547.98 | 9603.50  | 0.93                | 0.95    | 1.08      | 1.06    |
| 0 dpi  | N4  | 65.76                         | 64.76    | 470.78    | 139.15  | 80.50    | 0.47                | 5.85    | 2.15      | 0.17    |
| 0 dpi  | N5  | 87.67                         | 115.54   | 428.47    | 158.34  | 117.25   | 0.73                | 3.65    | 1.37      | 0.27    |
| 0 dpi  | N6  | 39.44                         | 76.08    | 266.46    | 120.57  | 75.75    | 0.63                | 3.52    | 1.58      | 0.28    |
| 40 dpi | D1  | 73.40                         | 11558.58 | 11027.30  | 5080.16 | 608.75   | 2.28                | 18.11   | 0.44      | 0.06    |
| 40 dpi | D2  | 63.29                         | 11944.11 | 10708.04  | 4251.51 | 228.25   | 2.81                | 46.91   | 0.36      | 0.02    |
| 40 dpi | D3  | 46.00                         | 10123.66 | 8647.48   | 3988.56 | 142.25   | 2.54                | 60.79   | 0.39      | 0.02    |
| 75 dpi | DZ1 | 50.40                         | 9632.15  | 9115.97   | 8157.26 | 8987.50  | 1.18                | 1.01    | 0.85      | 0.99    |
| 75 dpi | DZ2 | 52.02                         | 9118.69  | 8892.97   | 8261.68 | 8229.00  | 1.10                | 1.08    | 0.91      | 0.93    |
| 75 dpi | DZ3 | 291.27                        | 7715.80  | 6968.68   | 6813.81 | 6811.25  | 1.13                | 1.02    | 0.88      | 0.98    |
